# Supplementary material
Source: PubMed Central journal article supplement (PMC7033029)
Supplement: NIHMS1547396-supplement-1.pdf [file NIHMS1547396-supplement-1.pdf]

# S. Figure 1

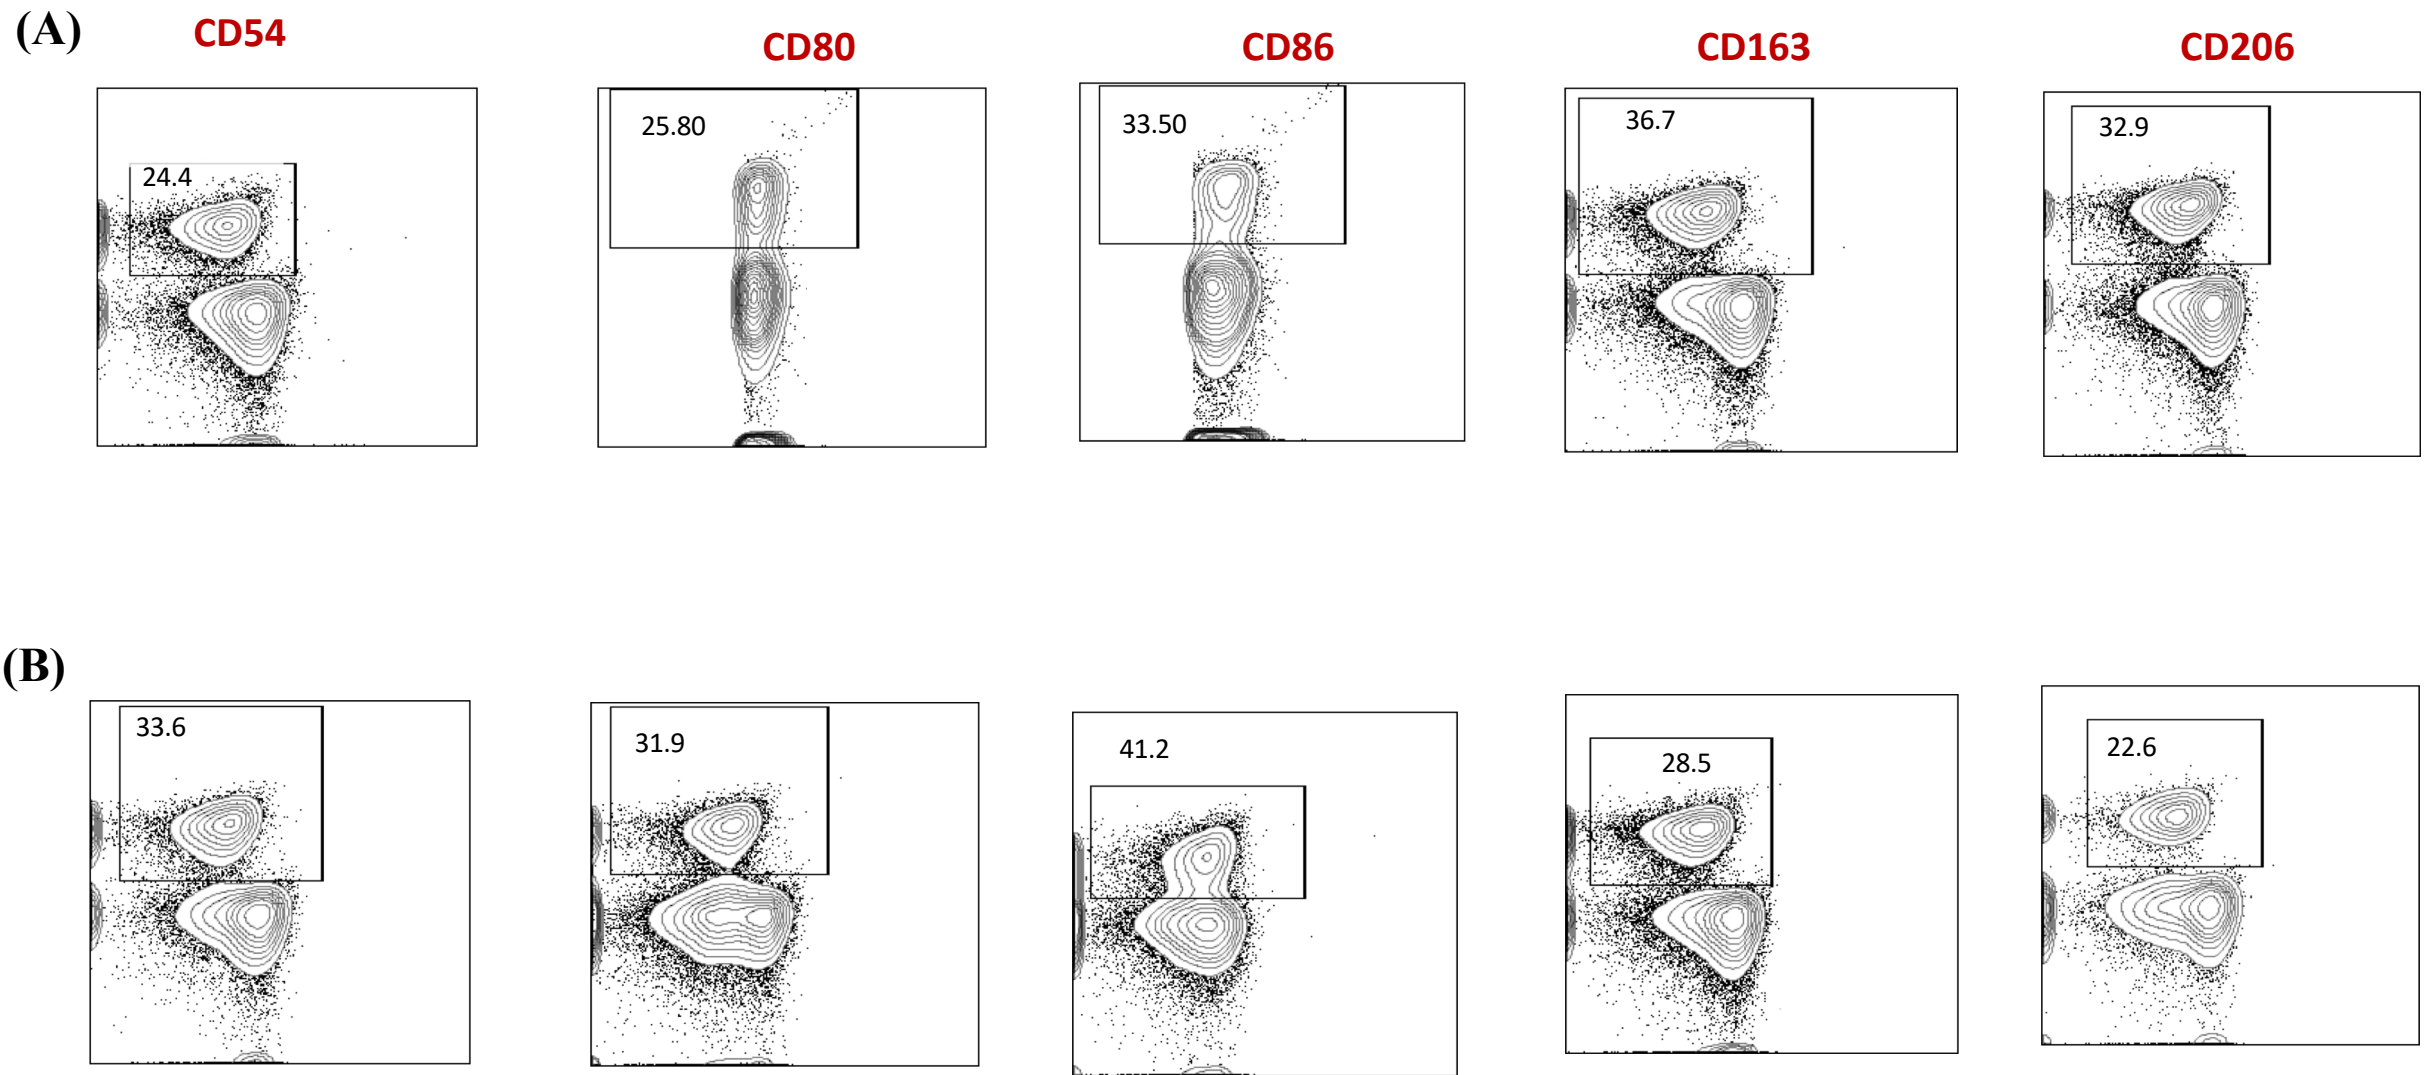

S. Figure 1. Representative dot plot for monocytes expressing surface markers and chemokine receptors. (A) Expression of surface markers and chemokine receptors in an Ss+ individual. (B) Expression of surface markers and chemokine receptors in an Ss- individual

# S.Figure.2

(A)

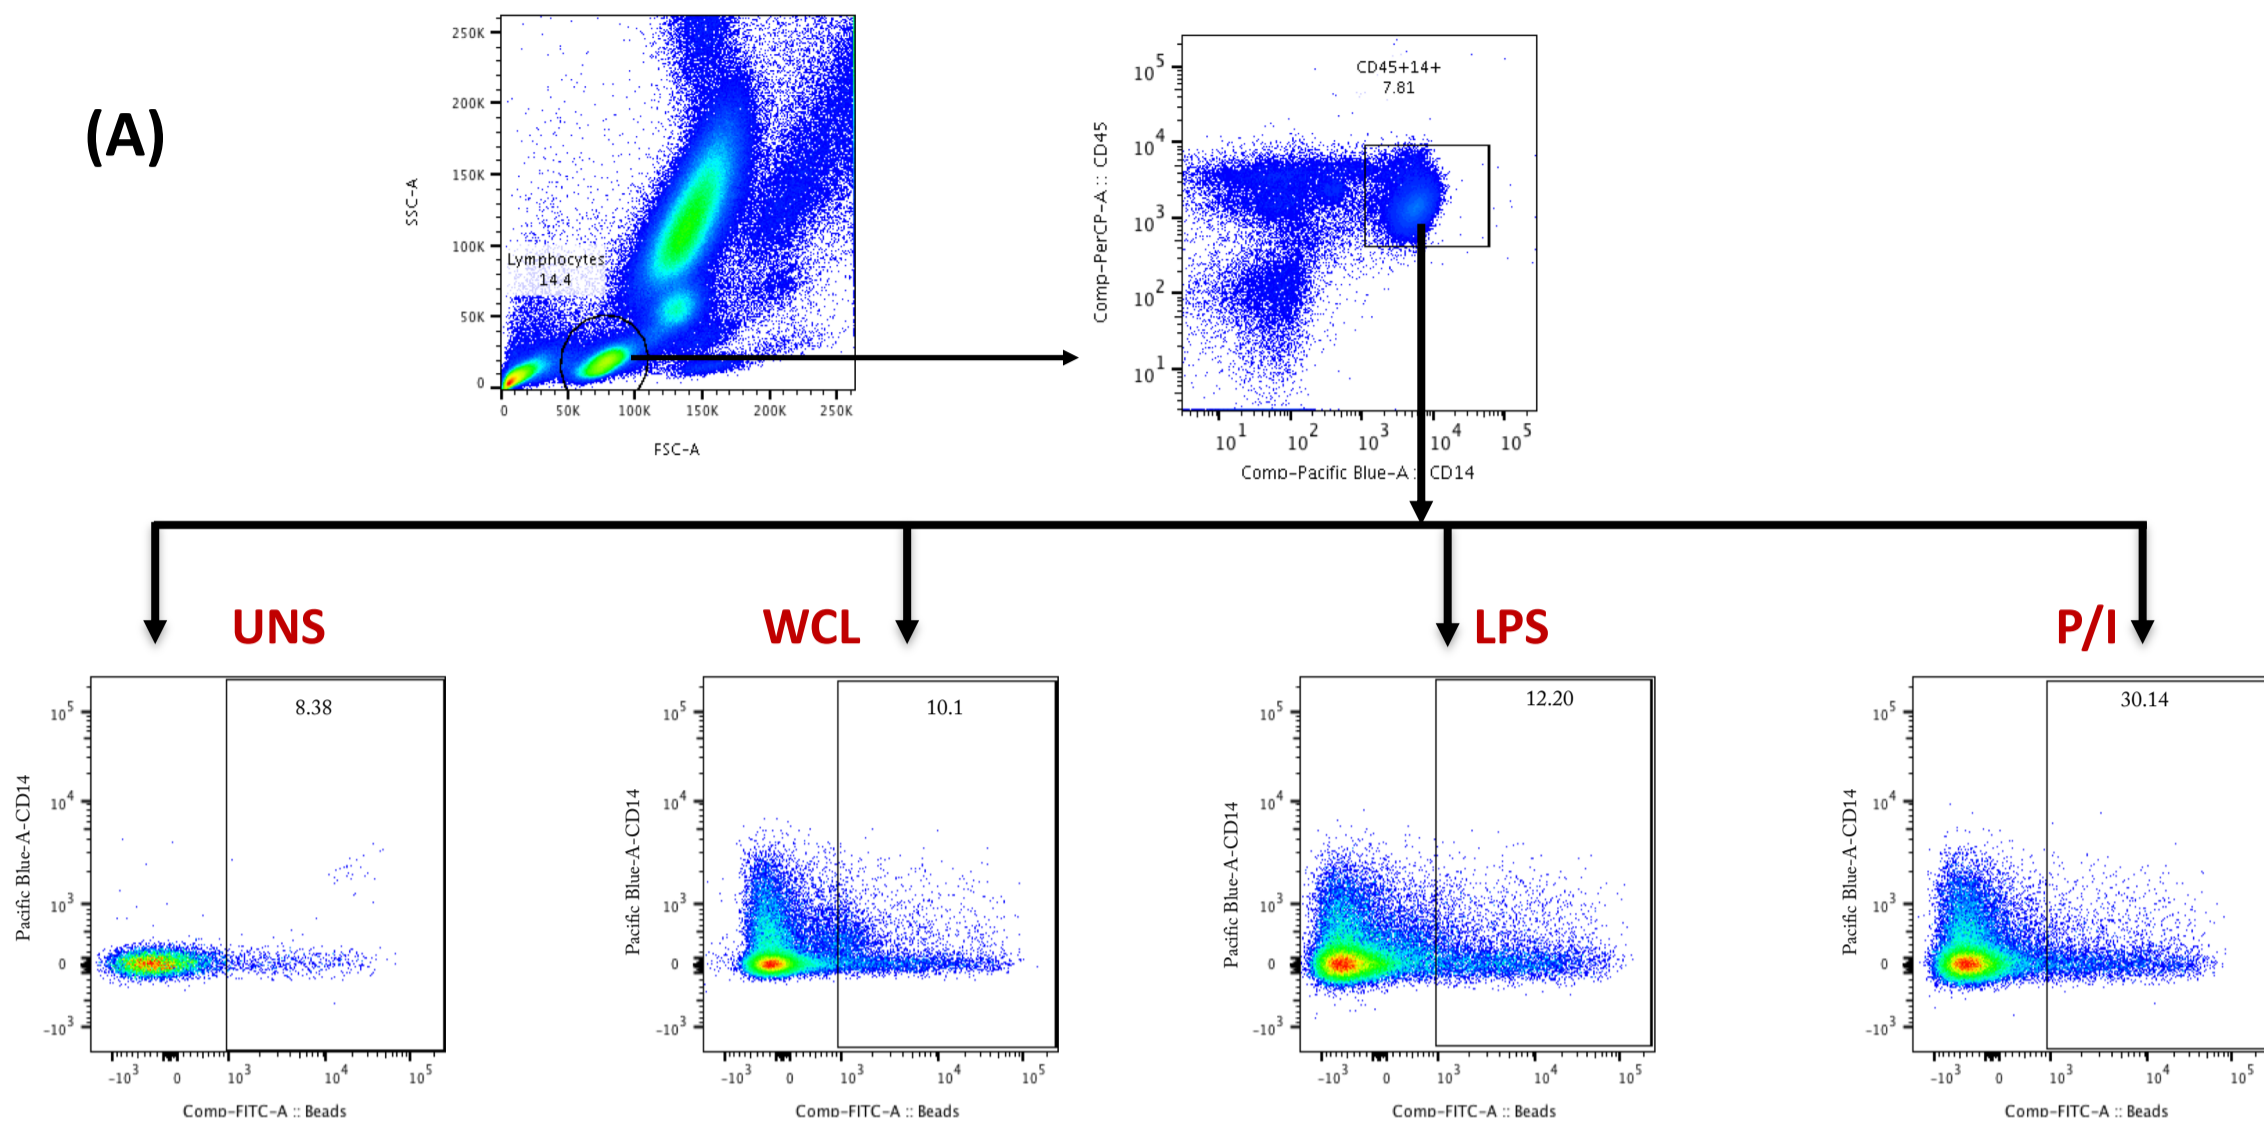

(B)

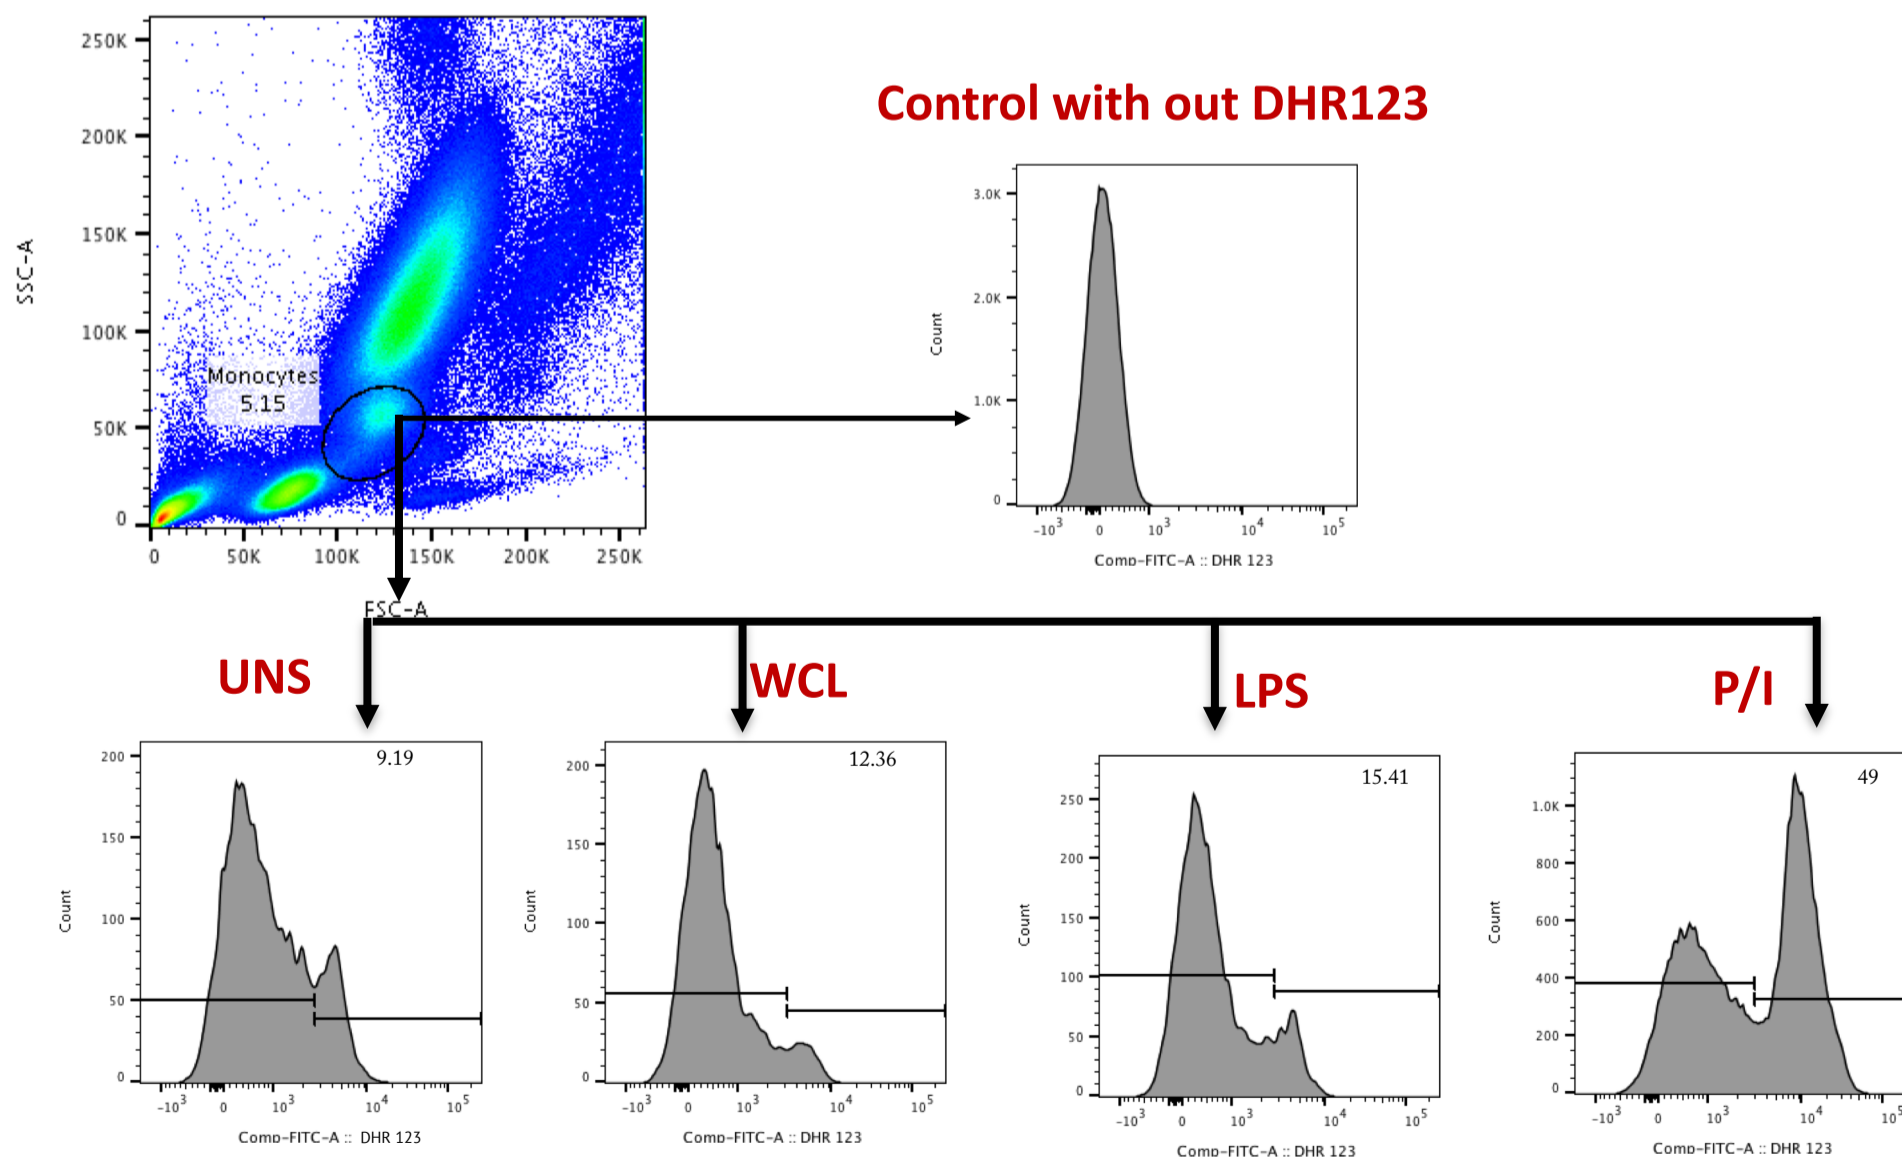

**Supplementary Figure 2. Gating strategy for phagocytosis and Monocyte Respiratory Burst Assays** (A) A representative flow cytometry plot showing the gating strategy for estimating frequencies of phagocytosis of *Ss*<sup>+</sup> individuals at baseline, WCL, LPS and P/I stimulations. (B) A representative flow cytometry plot showing the gating strategy for estimating frequencies of monocyte respiratory burst assay of *Ss*<sup>+</sup> individuals at baseline, WCL, LPS and P/I stimulations.

### S.Figure.3

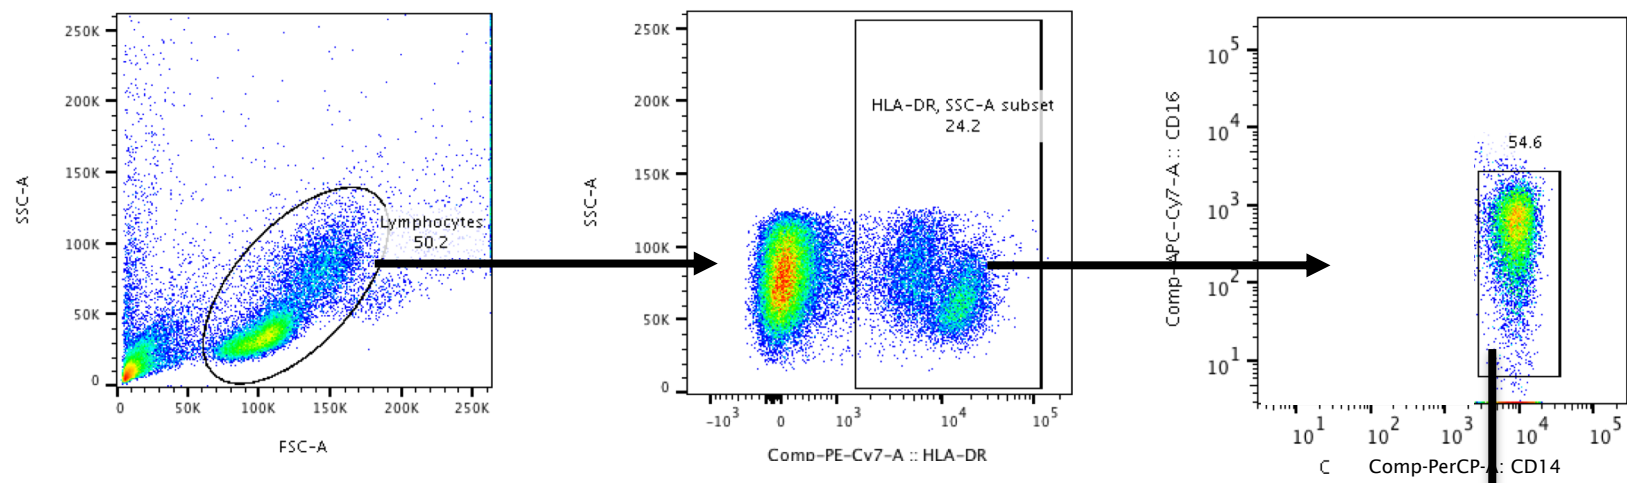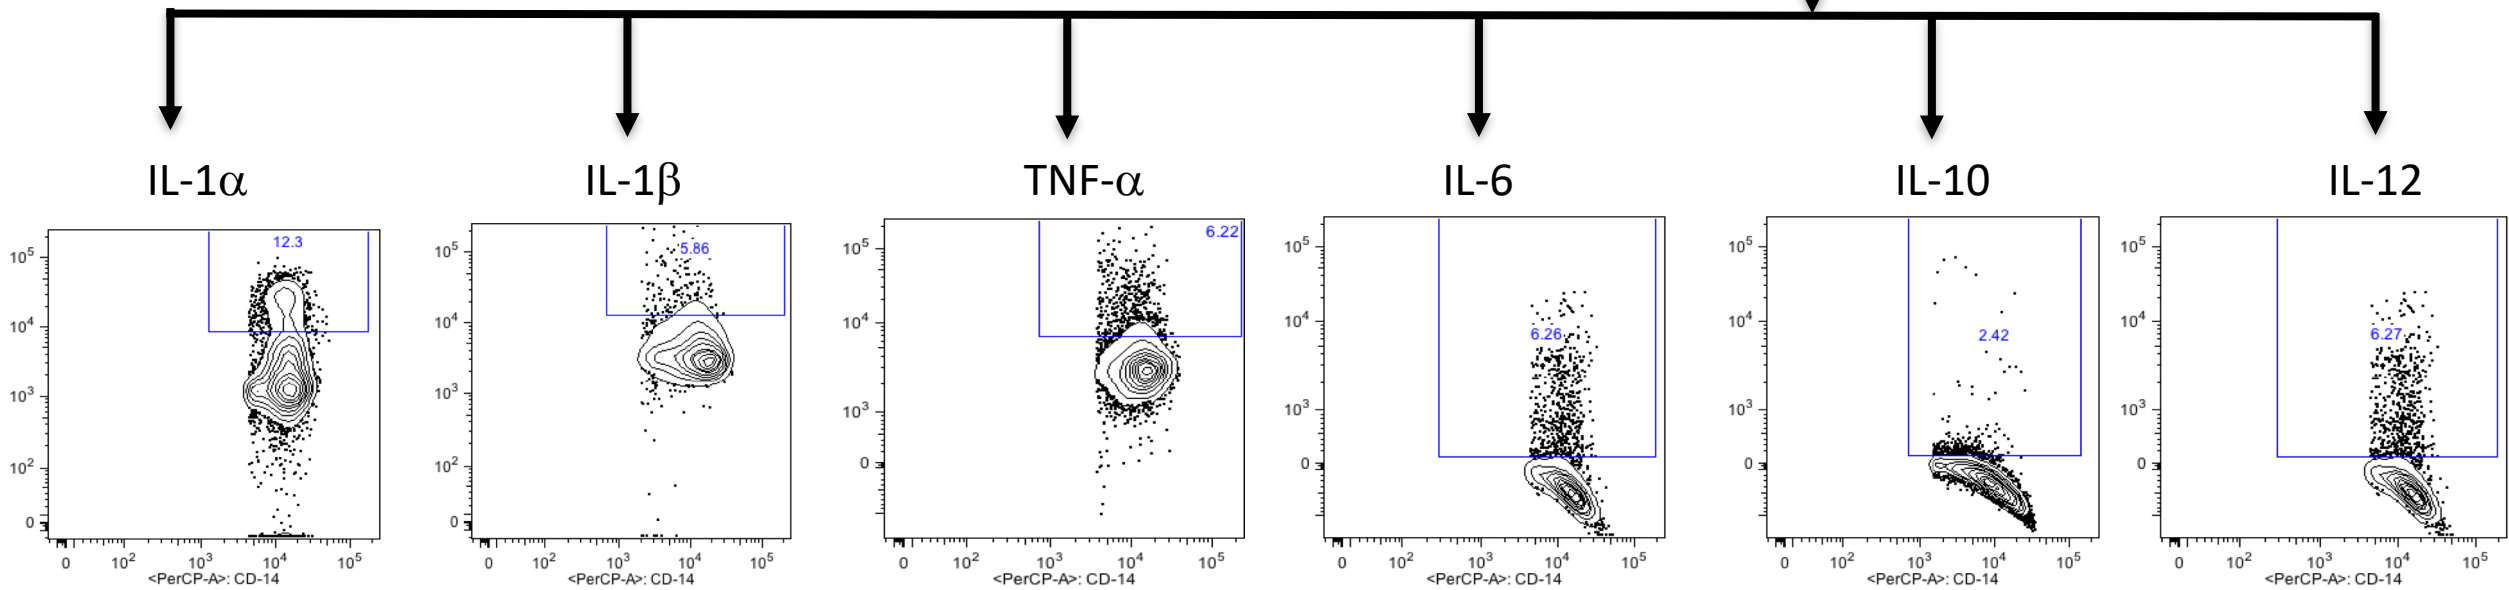

**Supplementary Figure 3. Gating strategy for monocyte expressing cytokines (A)** A representative flow cytometry plot showing the gating strategy for estimating frequencies of inflammatory cytokines in *Ss*+ individuals

## S. Figure 4.

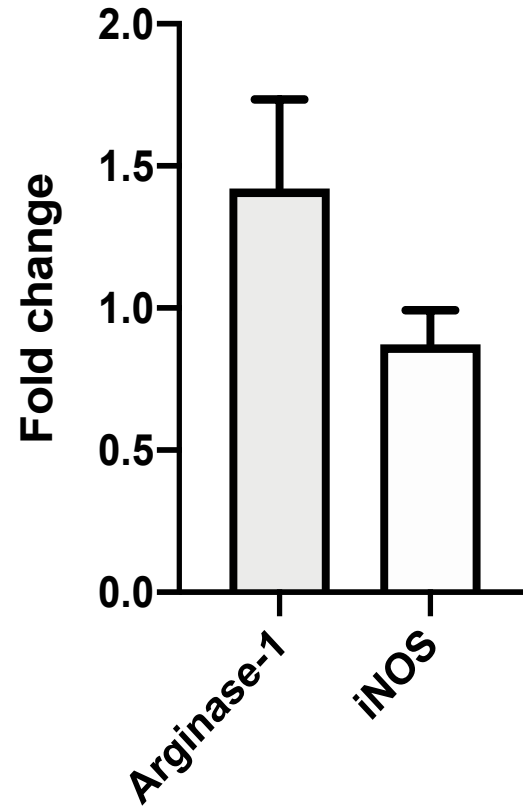

S. Figure 4. Fold change in expression of Arginase-1 and iNOS in Ss+ individuals compared to Ss- individuals. Arginase-1 and iNOS expression at baseline from PBMC of Ss+ (n=12) and Ss- (n=12) individuals were measured by qPCR. The fold change in the expression values of Arginase-1 and iNOS mRNA expression as shown as bar graphs with bars representing the geometric means and error bars representing the 95% confidence interval. The fold change was calculated as expression values in Ss+ individuals over the expression values in Ss- individuals
